# Supplementary material
Source: PubMed Central journal article supplement (PMC6748089)
Supplement: 41418_2018_242_MOESM1_ESM.pdf [file 41418_2018_242_MOESM1_ESM.pdf]

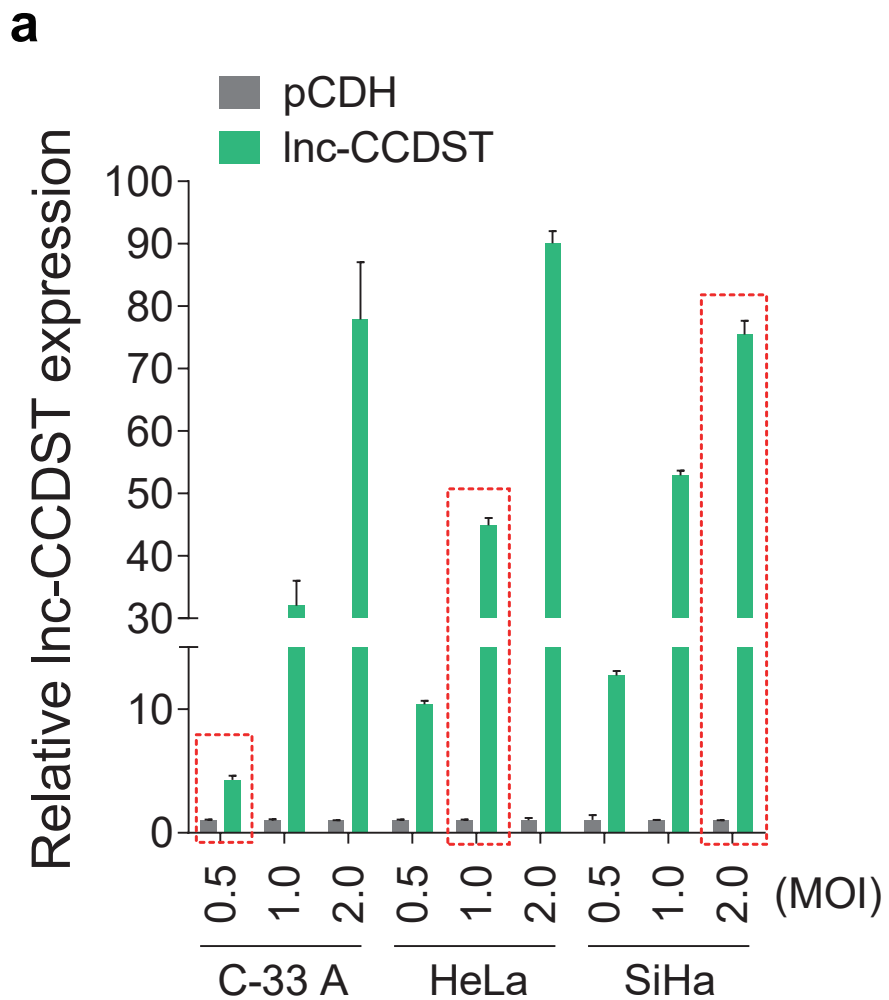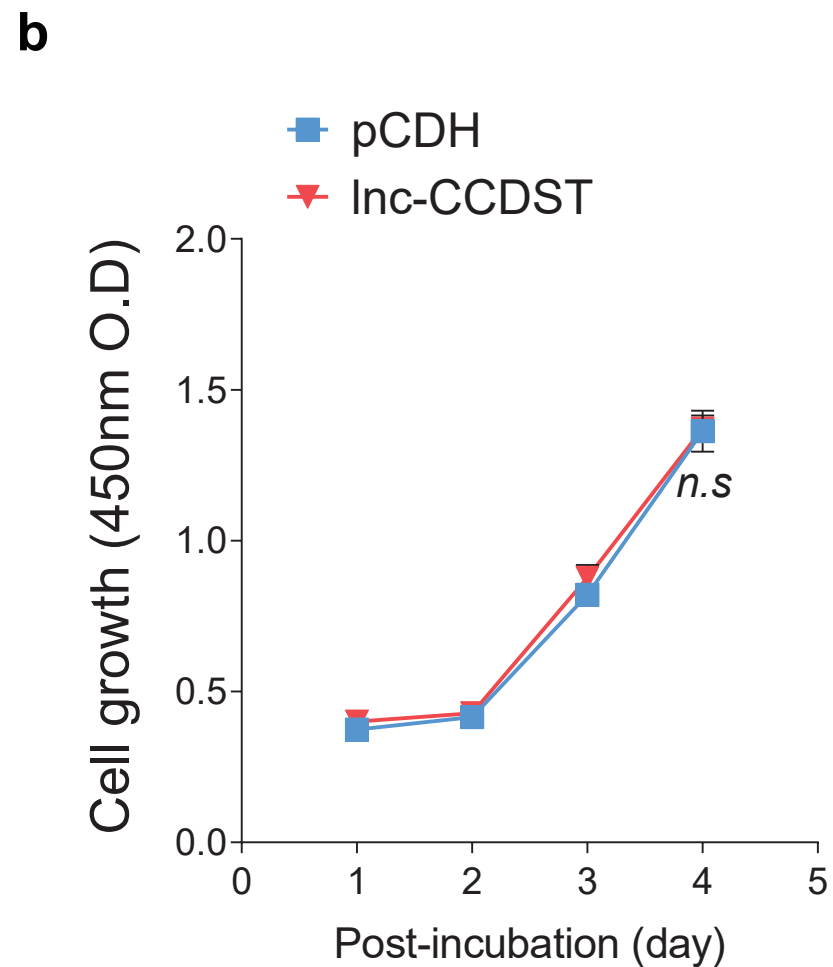

Supplementary Figure 1

**a**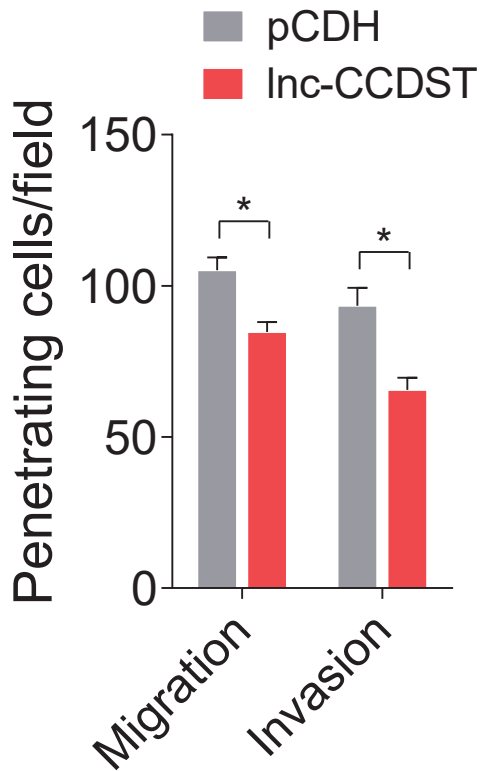**b**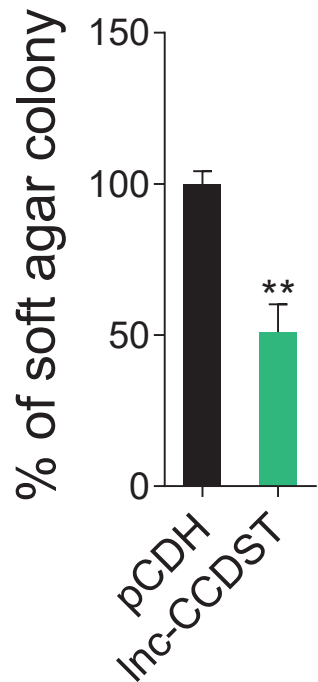

Supplementary Figure 2

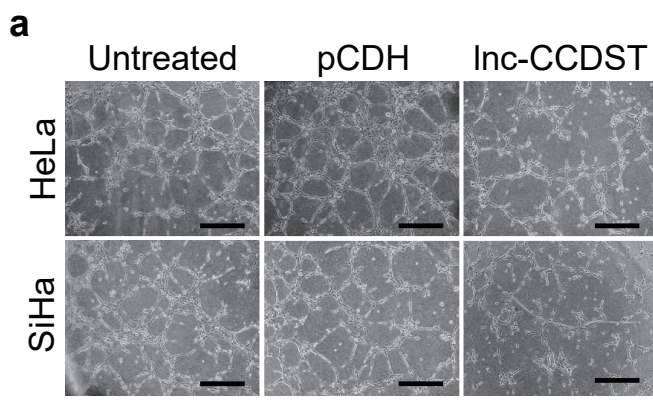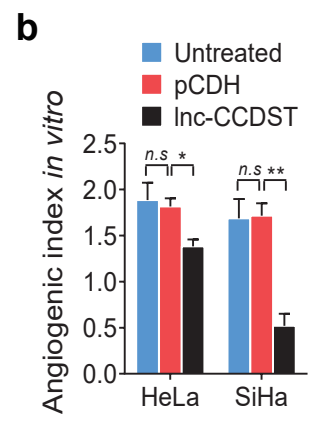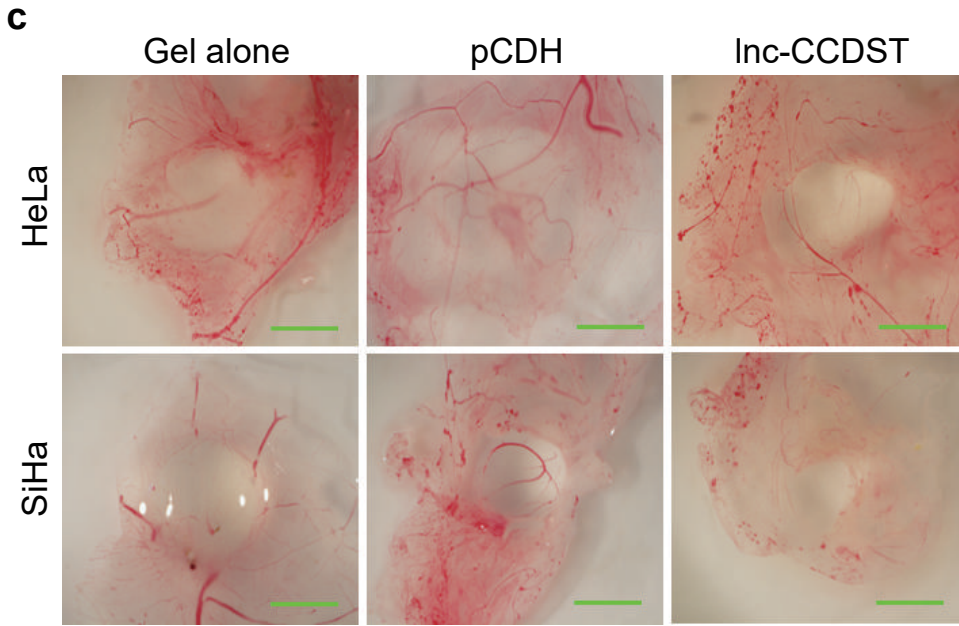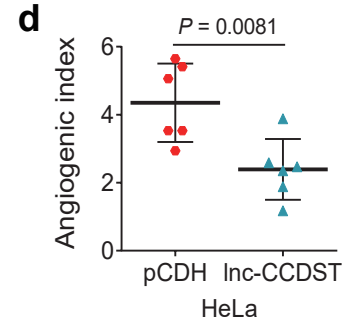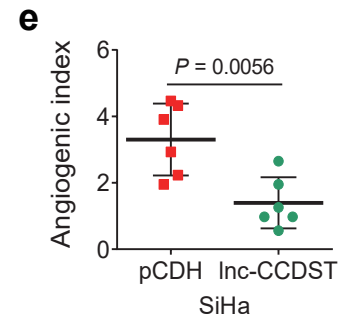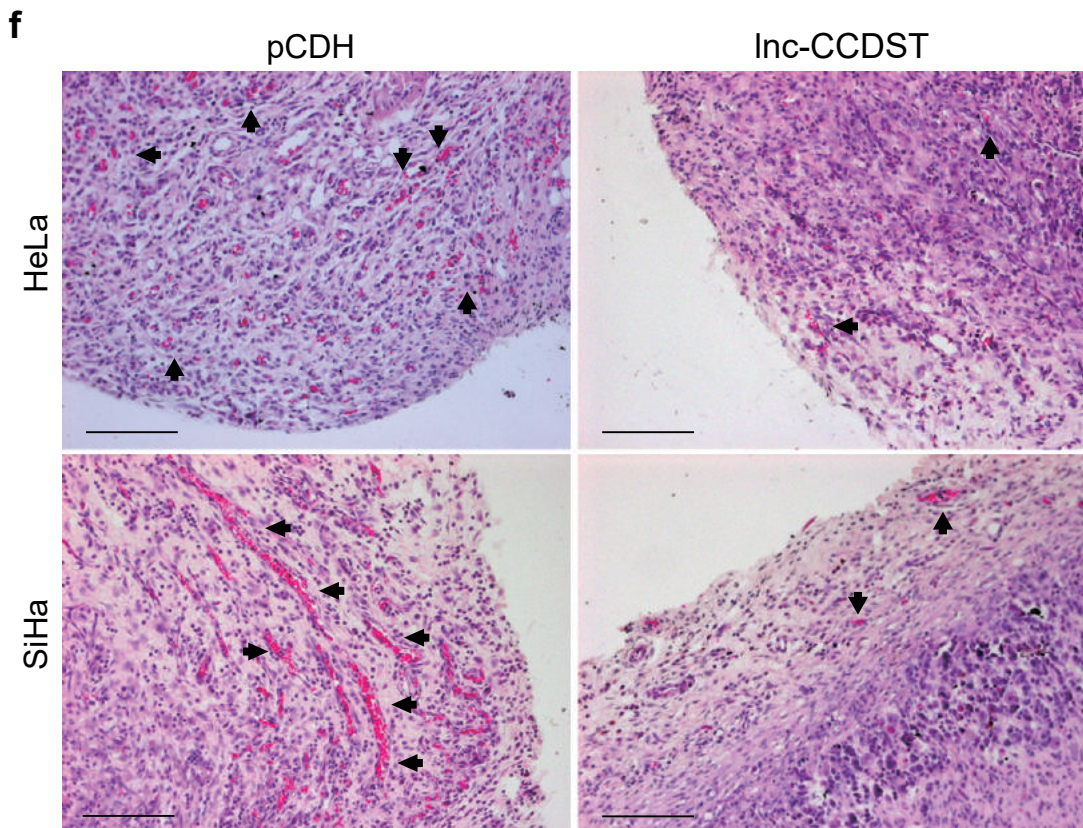

Supplementary Figure 3

Patient #1

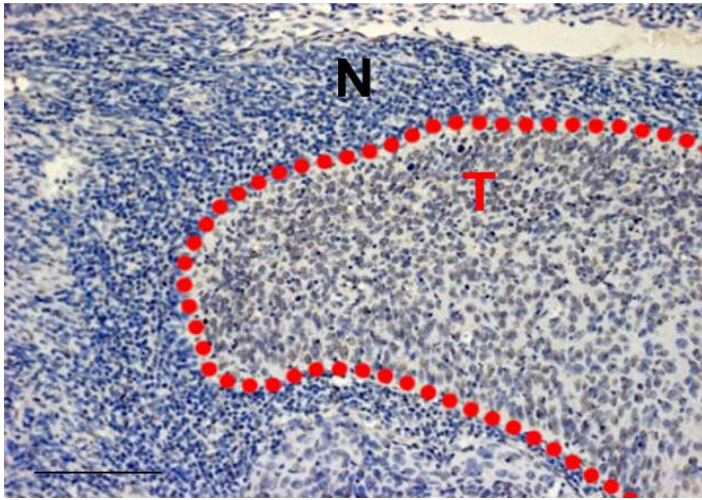

Patient #2

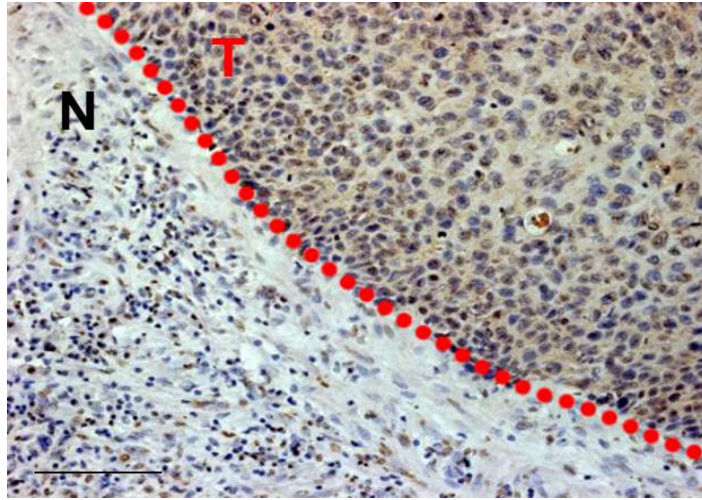

Patient #3

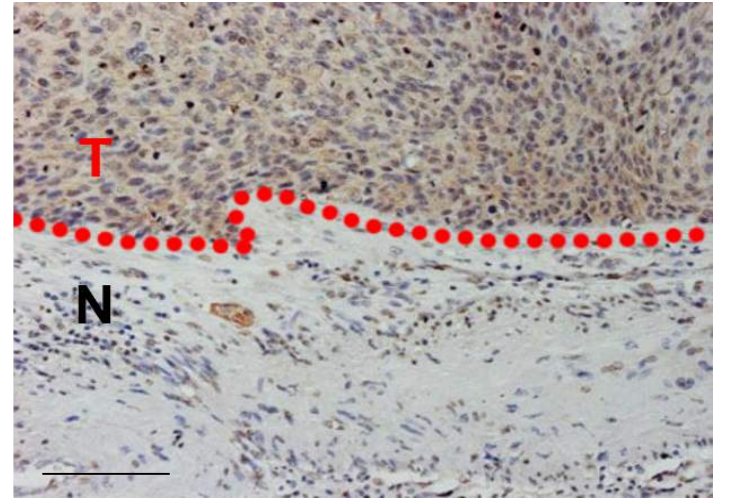

Patient #4

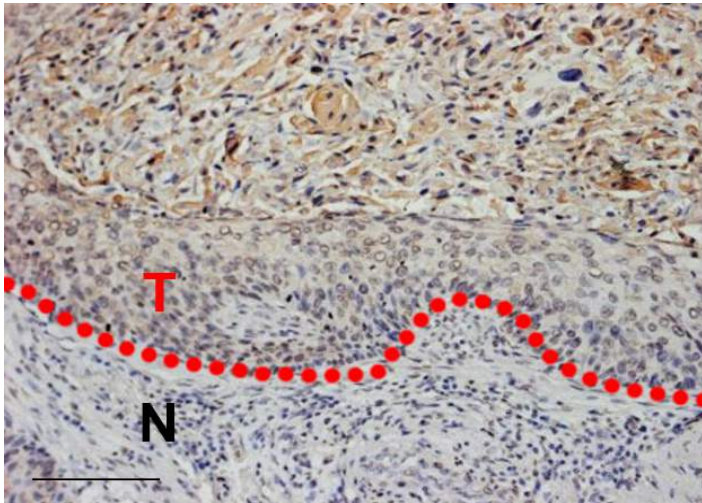

Patient #5

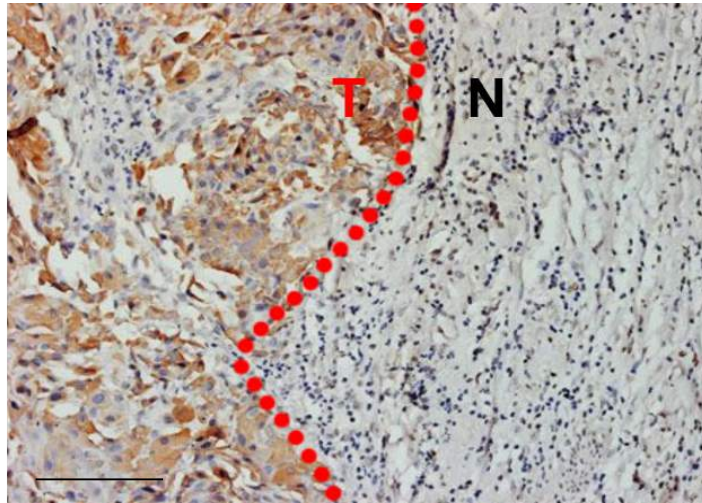

Patient #6

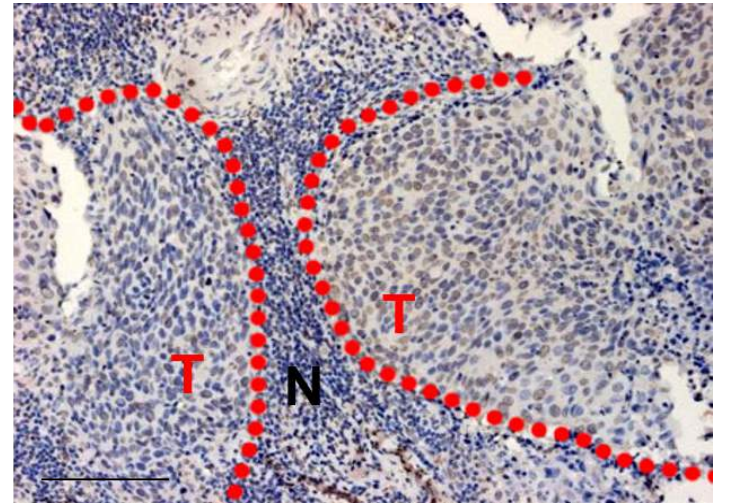

Patient #7

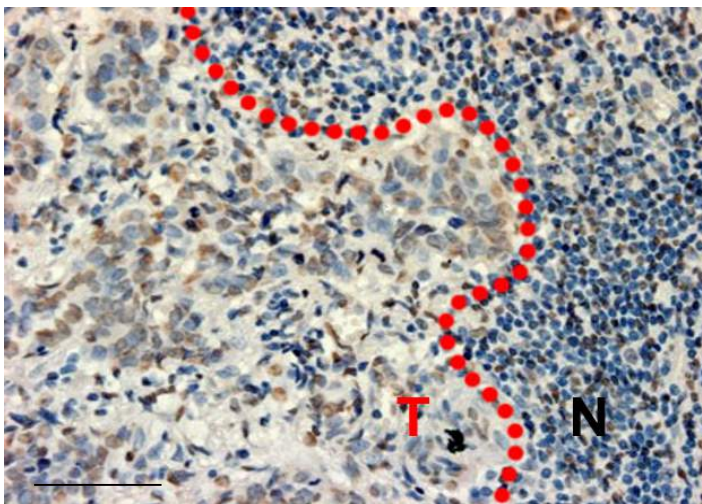

Patient #8

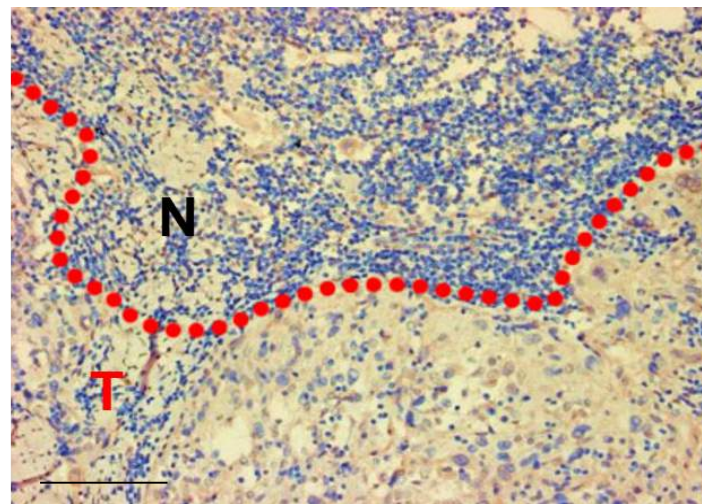

Patient #9

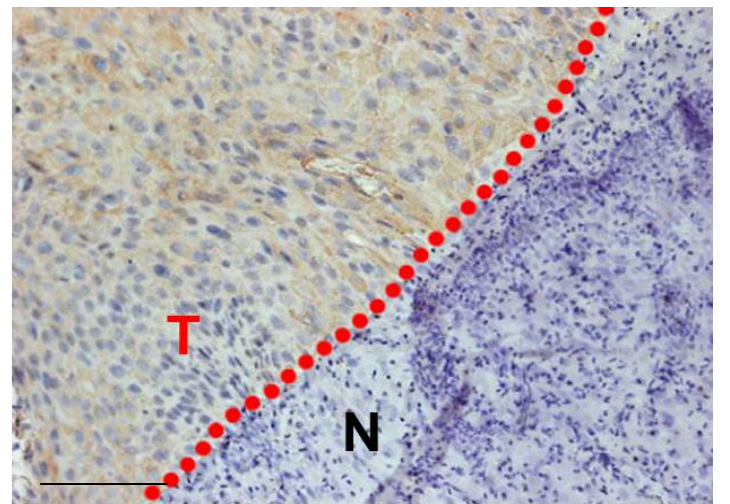

**a**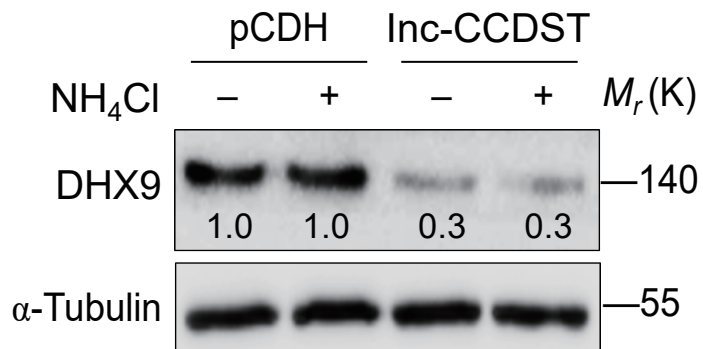**b**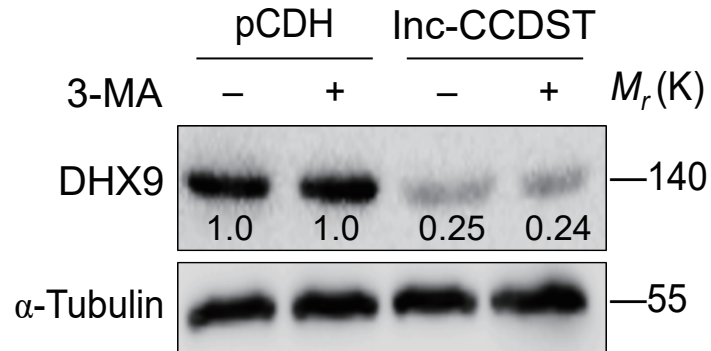

Supplementary Figure 5

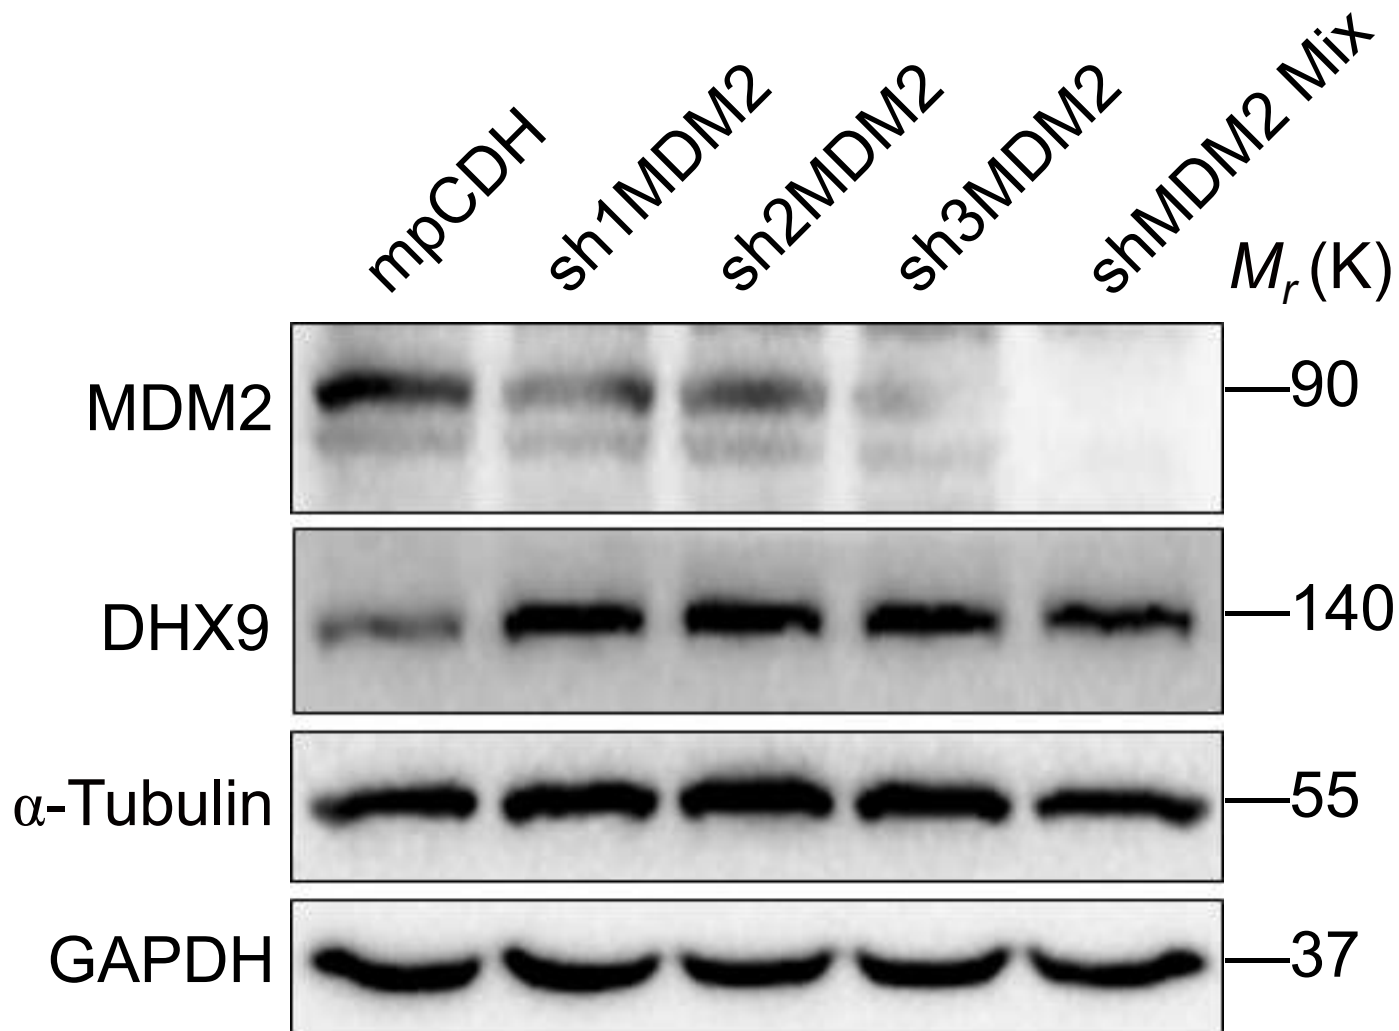

Supplementary Figure 6

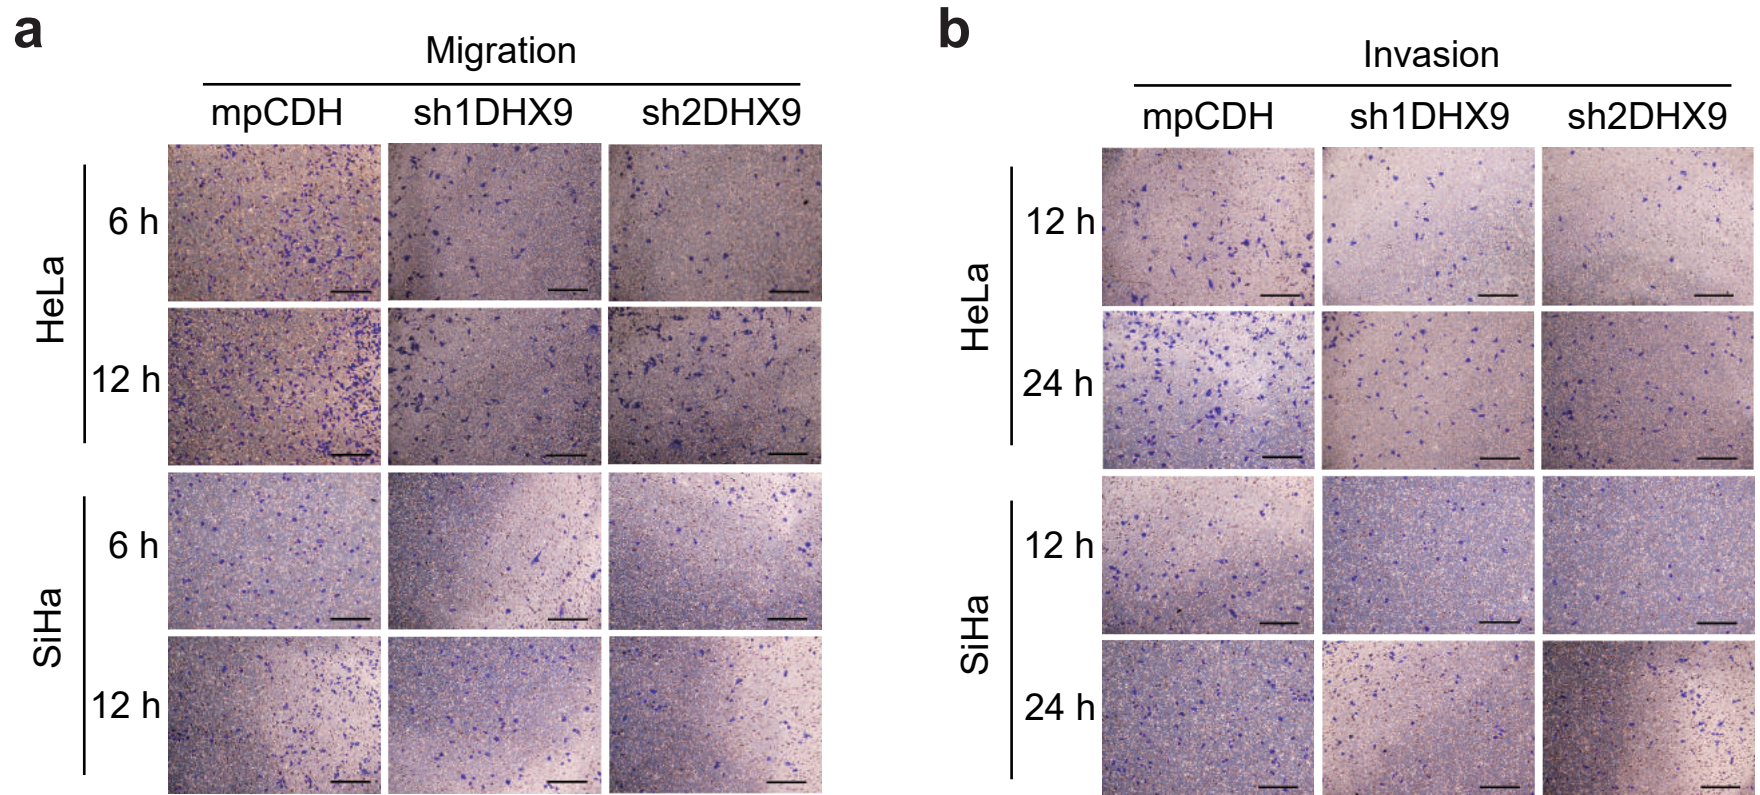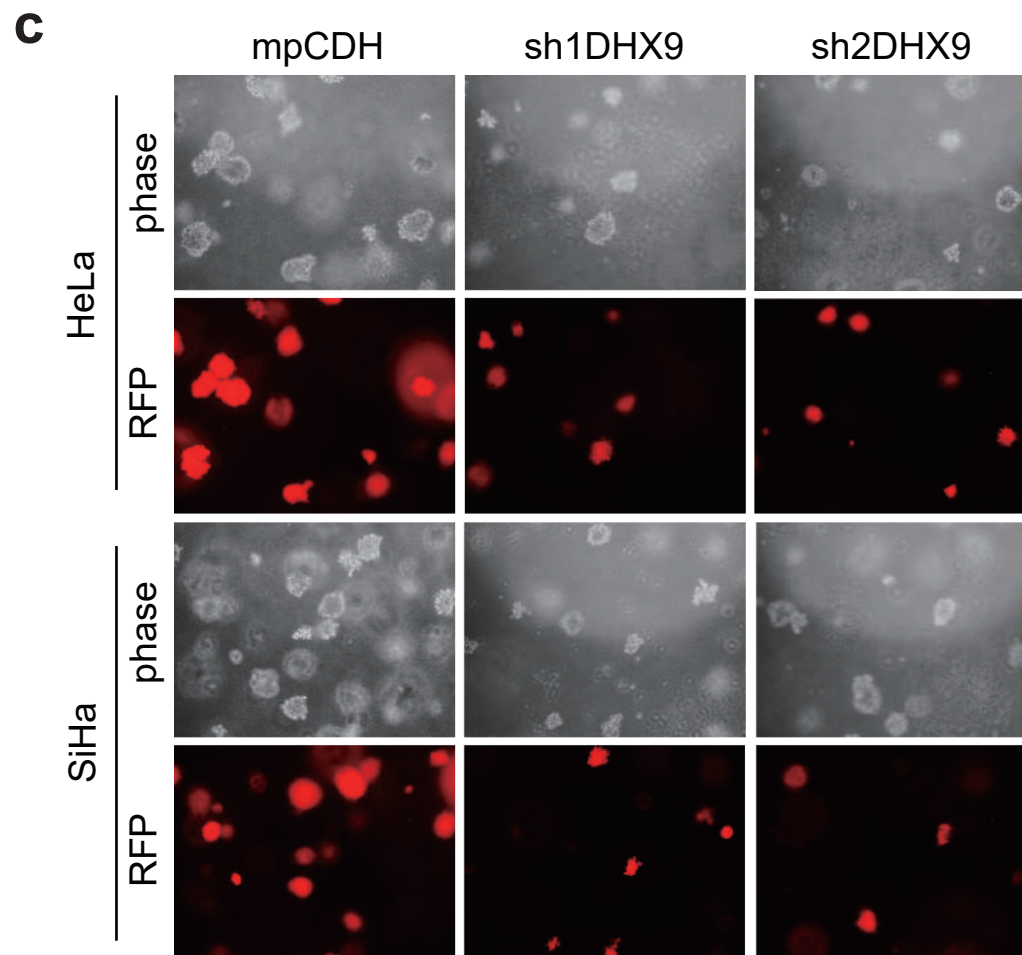

Supplementary Figure 7

**a**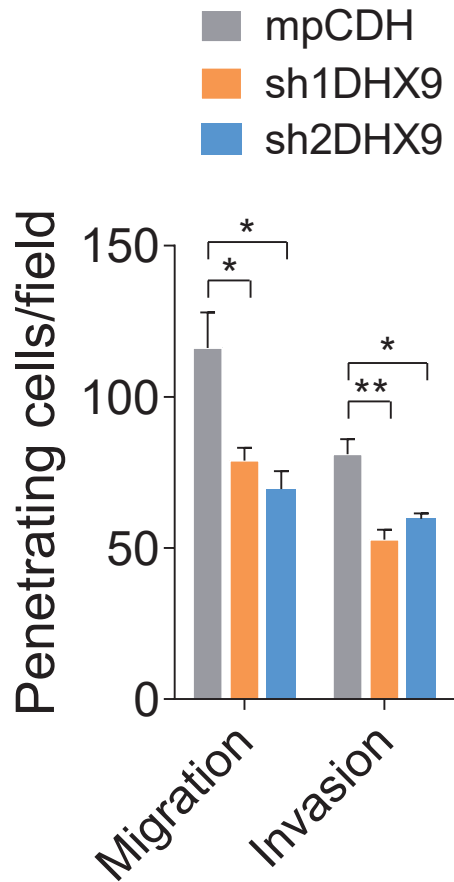**b**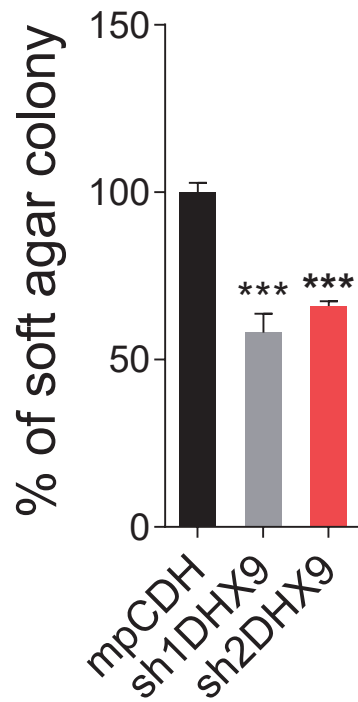

Supplementary Figure 8



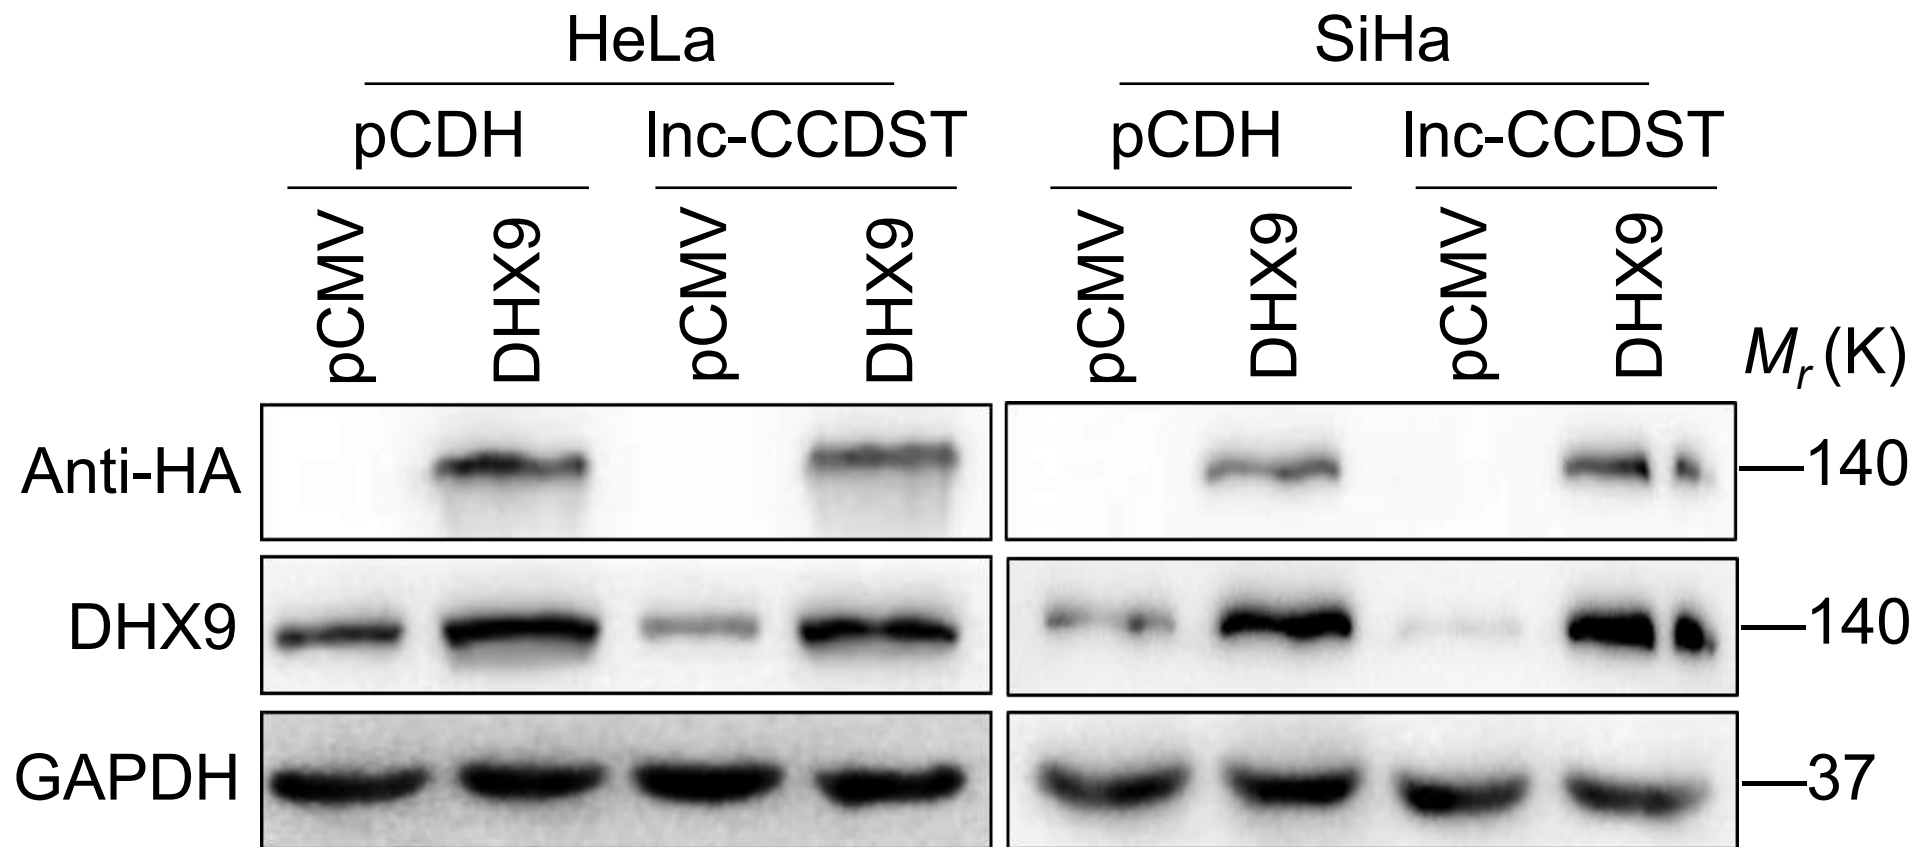

Supplementary Figure 9
